# Supplementary material for: Upconversion superballs for programmable photoactivation of therapeutics
Source: PubMed Central journal article supplement (PMC6783568; doi:10.1038/s41467-019-12506-w), 2019-10-08
Supplement: 41467_2019_12506_MOESM1_ESM.pdf [file 41467_2019_12506_MOESM1_ESM.pdf]

## SUPPLEMENTARY INFORMATION

### Upconversion Superballs for Programmable Photoactivation of Therapeutics

Zhen Zhang<sup>1#</sup>, Muthu Kumara Gnanasammandhan Jayakumar<sup>1#</sup>, Xiang Zheng<sup>1,2#</sup>, Swati Shikha<sup>1</sup>,

Yi Zhang<sup>1</sup>, Akshaya Bansal<sup>1</sup>, Dennis J.J Poon<sup>3</sup>, Pek Lim Chu<sup>4</sup>, Eugenia L.L Yeo<sup>5</sup>,

Melvin L.K. Chua<sup>3,4,5</sup>, Soo Khee Chee<sup>4,5,6</sup> & Yong Zhang<sup>1,2,\*</sup>

**Supplementary Table 1.** Abbreviations, structural and compositional details of UCNPs used in study

| Name | Core                                  | Shell                    | Shell                    | Core:Shell Ratio |
|------|---------------------------------------|--------------------------|--------------------------|------------------|
| A    | NaYF <sub>4</sub> :60%Yb, 20%Gd, 2%Er | NaLuF <sub>4</sub> :25%Y | --                       | 1:1              |
| B    | NaYF <sub>4</sub> :30%Yb, 0.5%Tm      | NaYF <sub>4</sub> :10%Yb | NaNdF <sub>4</sub> :10Yb | 1:0.2:1          |
| C    | NaYF <sub>4</sub> :20%Yb, 2%Er        | NaYF <sub>4</sub> :10%Yb | NaNdF <sub>4</sub> :10Yb | 1:0.2:2          |
| D    | NaYF <sub>4</sub> :20%Yb, 2%Er        | NaLuF <sub>4</sub> :25%Y | --                       | 1:1              |
| E    | NaYF <sub>4</sub> :30%Yb, 0.5%Tm      | NaLuF <sub>4</sub> :25%Y | --                       | 1:1              |

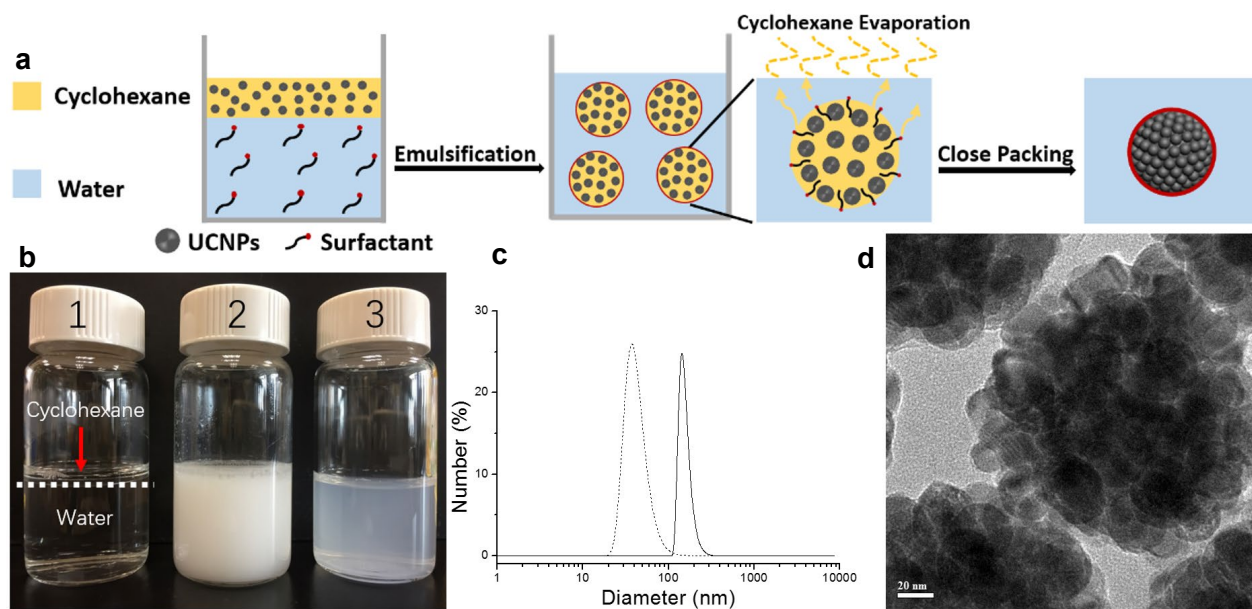

**Supplementary Figure 1.** Emulsion-based self-assembly of OP-SBs. **a**, A scheme showing the self-assembly of UCNPs into OP-SBs structures via an emulsion-based process. **b**, Photos of OP-SBs fabrication process: 1) 1 mL cyclohexane suspension of the mixed UCNPs A and B (total concentration: 5 mg/mL) mixed with 10 mL water containing 7 mg SDS, forming immiscible two layers when put together. 2) After sonication and vertexing, turbid microemulsion solution was obtained. 3) OP-SBs solution was obtained after cyclohexane evaporated from water. **c**, DLS characterization of mixed UCNPs cyclohexane suspension (dash line) and corresponding OP-SBs water suspensions (solid line). **d**, High resolution TEM image of OP-SBs.

The oil phase (cyclohexane) containing well-dispersed oleic acid (OA)-capped two types of UCNPs (5 mg/mL) and the aqueous phase containing surfactants (sodium dodecyl sulfate (SDS)) were mixed together at an oil-to-water ratio of 1:10 (v/v). A stable O/W emulsion system was obtained under vigorous stirring and sonication, by which the well-dispersed UCNPs were confined in the emulsion droplets that were stabilized by the surfactants present in the aqueous phase. Subsequently, the low-boiling solvent (cyclohexane) was evaporated from the oil emulsion droplets by heating the solution at 70 °C. During solvent removal, the droplets shrink and the UCNPs in the droplets get concentrated and pack closely with each other, thereby assembling to form OP-SBs. Through hydrophobic Van der Waals interactions, the SDS's alkane chains from the aqueous phase will interdigitate spontaneously with the OA's alkane chains located on the outer surface of the OP-SBs. Hence the obtained spherical OP-SBs were well-dispersed in water. Zeta potential characterization indicated that these OP-SBs had a negative surface charge (about -61 mV) due to the presence of the anionic surfactant (SDS) on their surfaces.

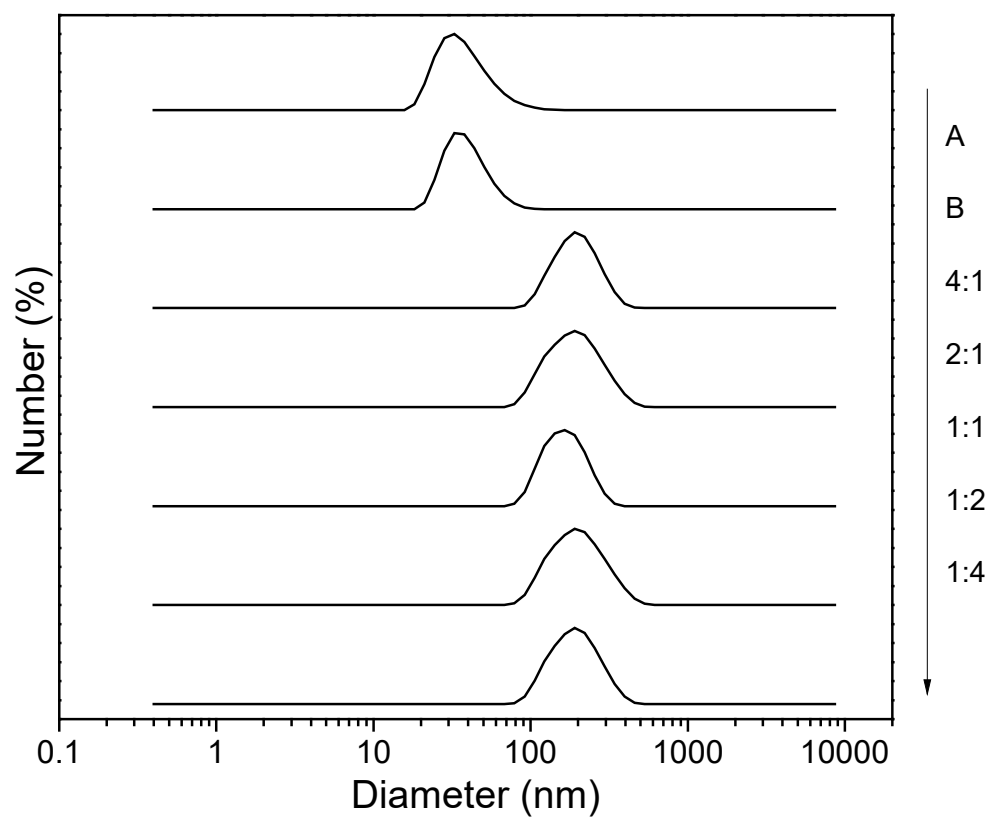

**Supplementary Figure 2.** DLS results of as prepared superball with different A:B mixing ratios.

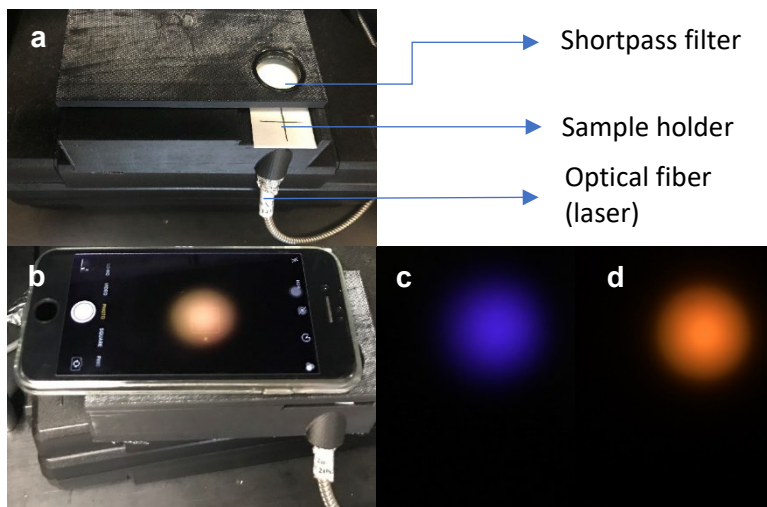

**Supplementary Figure 3.** Details of smartphone photography device: **a**, Device setup, **b**, Picture showing the working condition. Original camera photos of OP-SBs under 808 (**c**) and 980 nm (**d**) laser excitation.

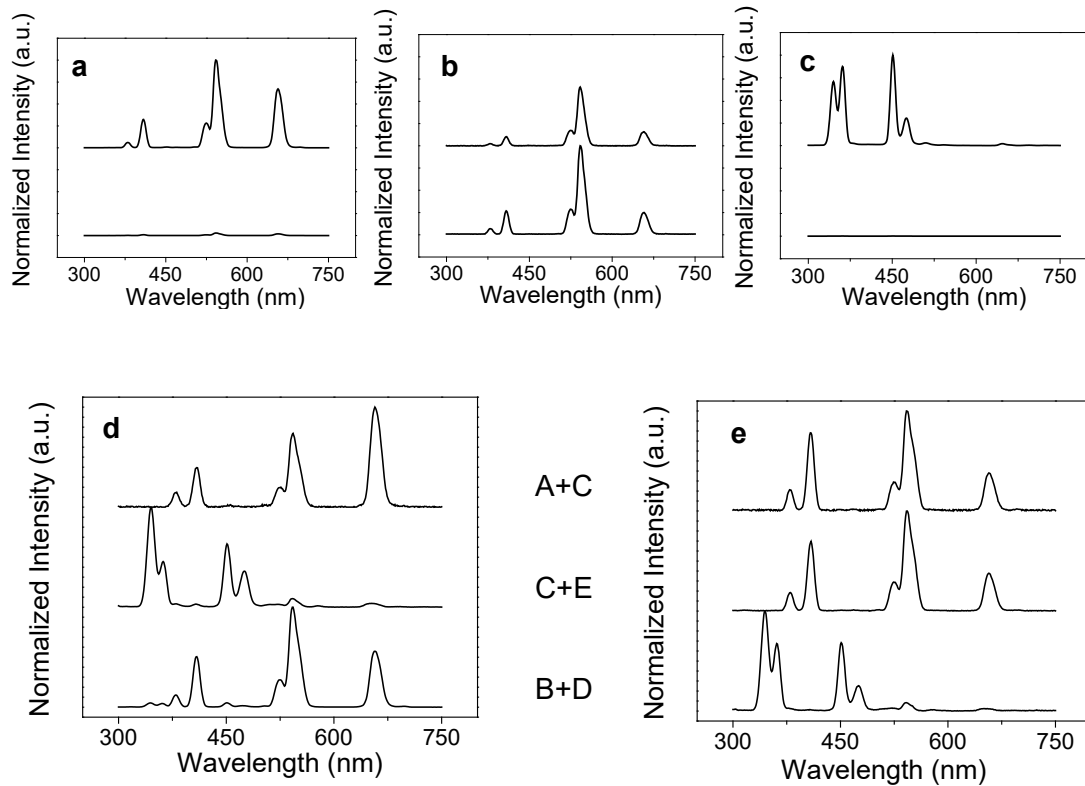

**Supplementary Figure 4.** a-c, Spectrums of UCNPs C, D and E under 980 nm laser (above) and 800 nm laser (bottom). Spectrums of OP-SBs suspension under 980 nm (d) and 800 nm laser (e).

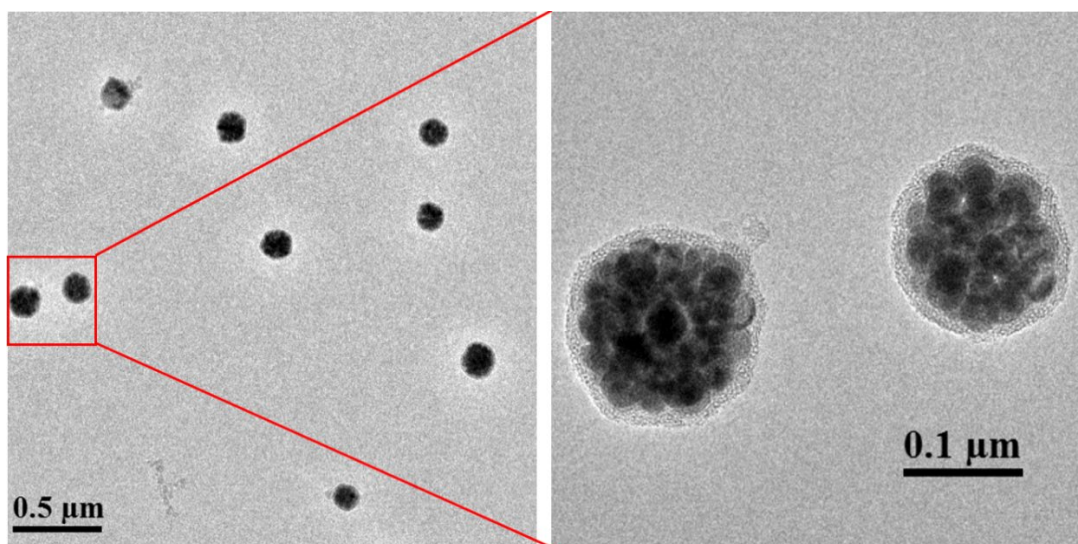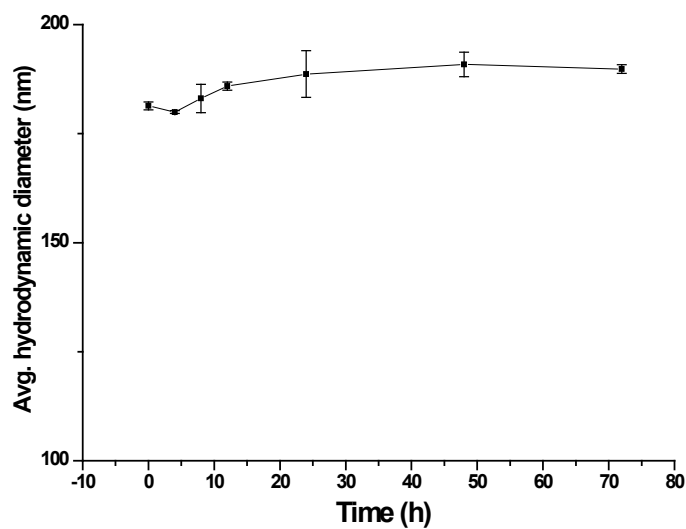

**Supplementary Figure 5.** TEM images of mesoporous silica coated OP-SBs (OP-SBs@mSiO<sub>2</sub>) with inset magnifications and DLS data showing stability of OP-SBs@mSiO<sub>2</sub> in pH=4.5 water solution conducted over 72 hours. Error bars represent the standard deviation of three distinct measurements

**Supplementary Table 2.** Characteristics of OP-SBs@azo-Psi.

| Hydrodynamic radius | Zeta Potential | Loading content (/mg UCNPs) |              |
|---------------------|----------------|-----------------------------|--------------|
| 232.1±14.4          | -21.7 mV±0.41  | 101 μg ZnPc                 | 8.4 μg siRNA |

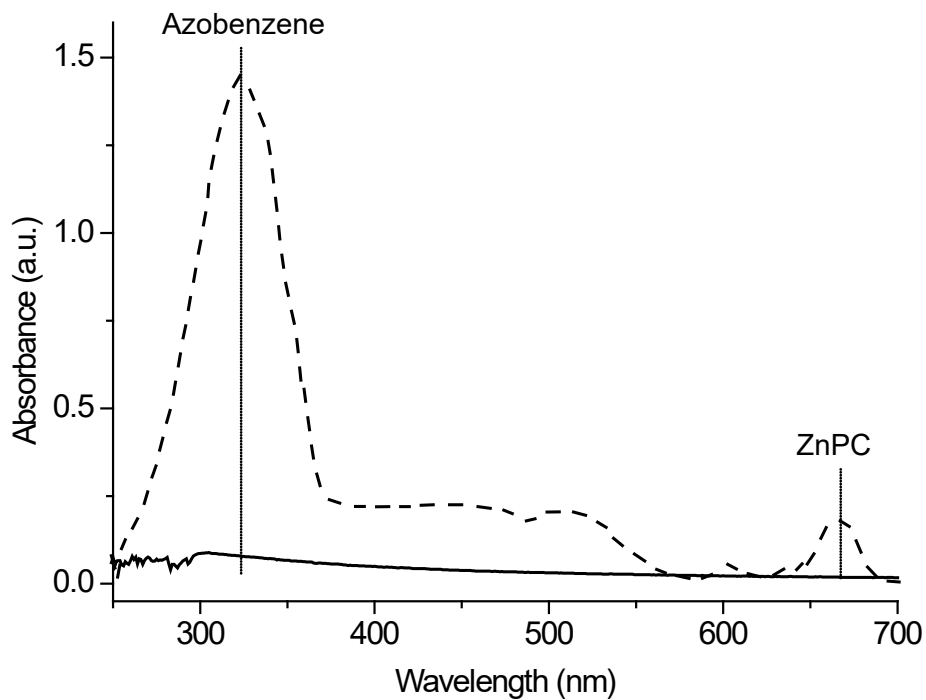

**Supplementary Figure 6.** UV-Vis absorbance spectrophotometry of OP-SBs@mSiO<sub>2</sub> (solid line) and OP-SBs@mSiO<sub>2</sub> after loading ZnPC and azobenzene (dash line). Absorbance peaks of azobenzene and ZnPC are specified in the graph (dot lines).

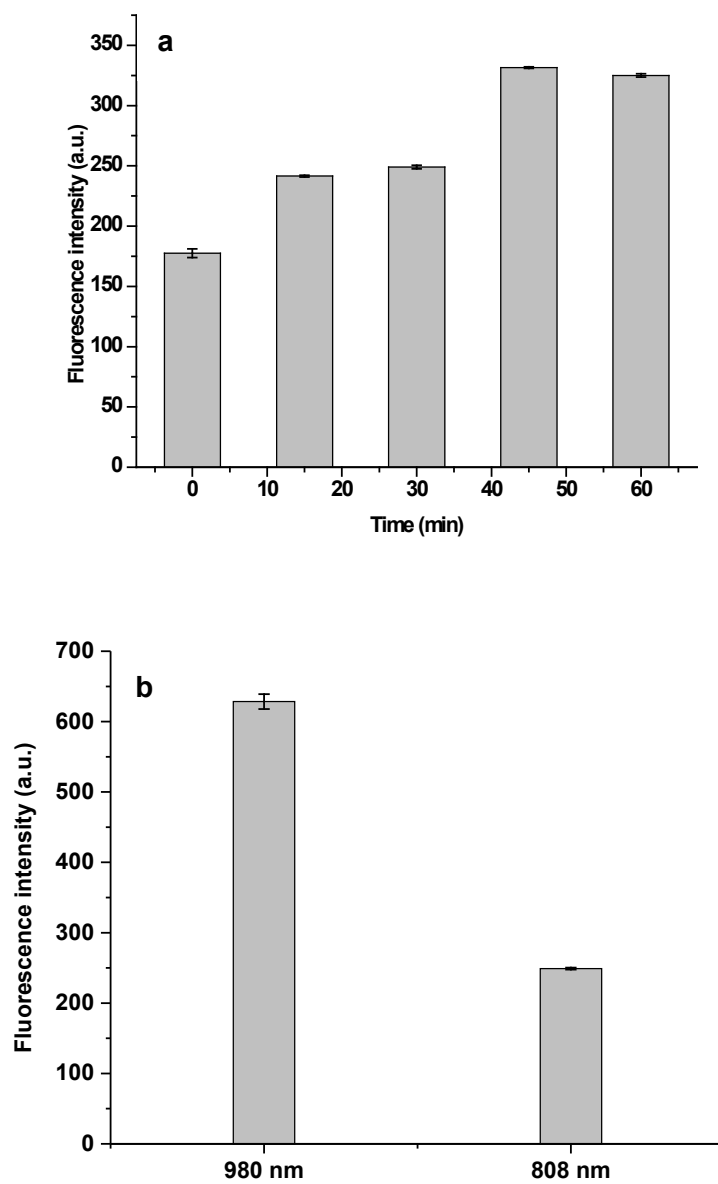

**Supplementary Figure 7.** Singlet oxygen production using 800 nm excitation of the OP-SBs@azo-Psi (a) and comparison with 980 nm excitation (b). Error bars represent the standard deviation of three distinct measurements



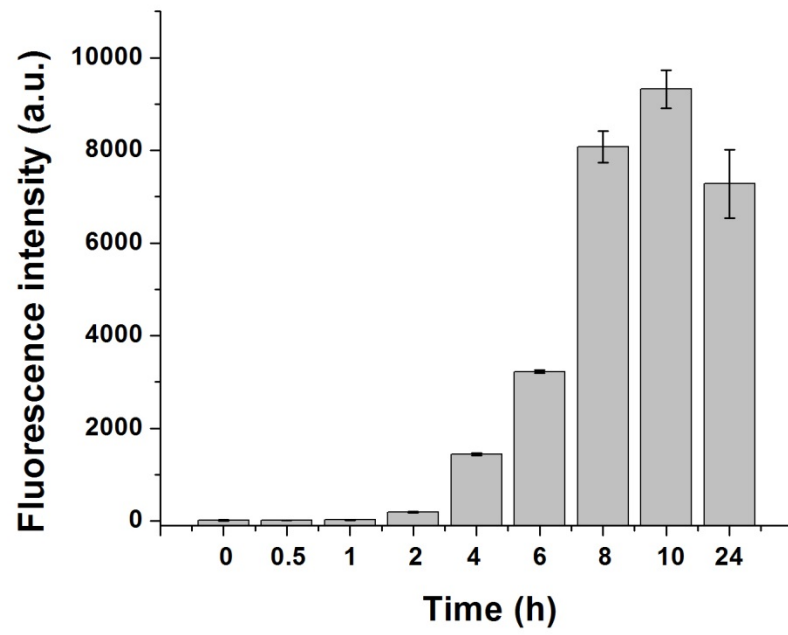

**Supplementary Figure 8.** Cellular uptake of OP-SBs over time. Error bars represent the standard deviation of three distinct measurements

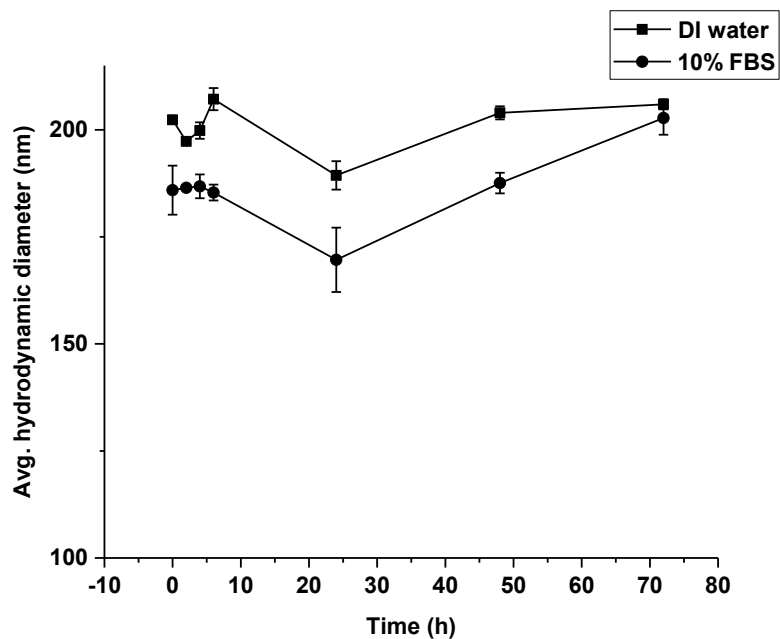

**Supplementary Figure 9.** DLS data showing stability of OP-SBs@azo-Psi in DI water and 10% FBS conducted over 72 hours. Error bars represent the standard deviation of three distinct measurements

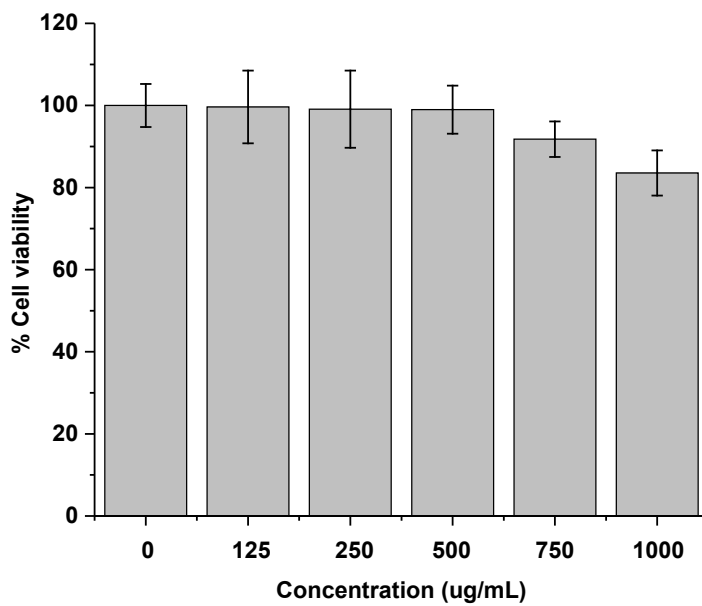

**Supplementary Figure 10.** Cytotoxicity of various concentrations of OP-SBs@azo-Psi on HeLa cells. Error bars represent the standard deviation of three distinct measurements

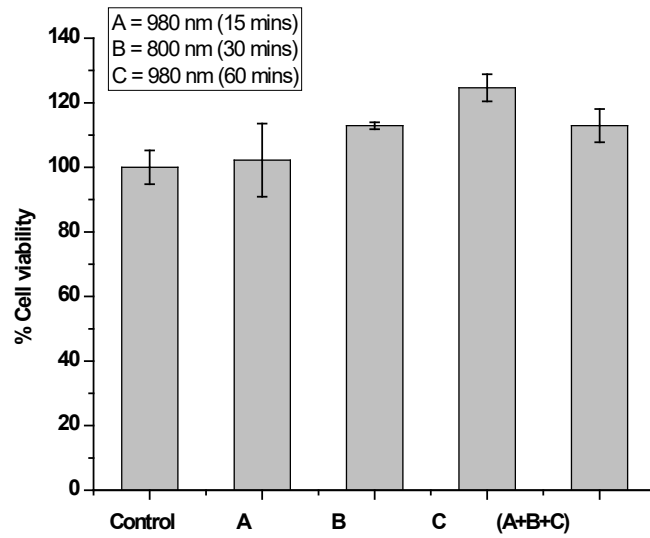

**Supplementary Figure 11.** Phototoxicity of NIR light on HeLa cells. Error bars represent the standard deviation of three distinct measurements

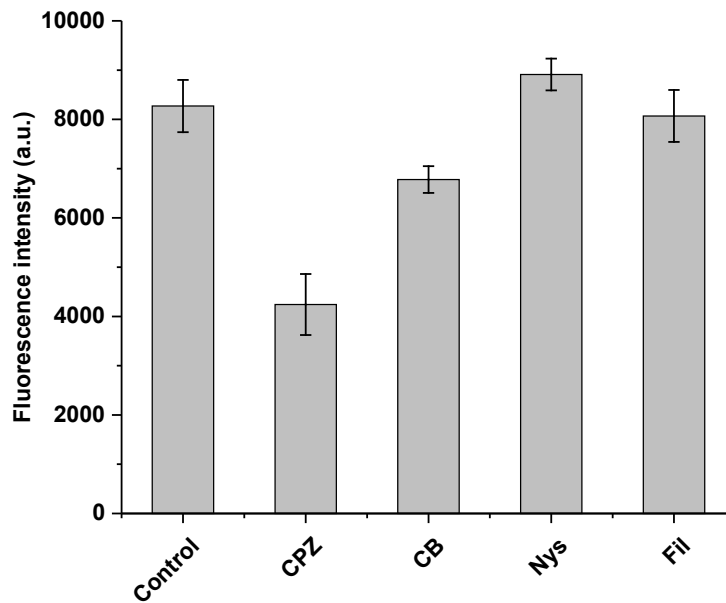

**Supplementary Figure 12.** Elucidation of the mechanism of OP-SBs@azo-Psi uptake using inhibitors of endocytosis, macropinocytosis and lipid raft mediated uptake. Error bars represent the standard deviation of three distinct measurements

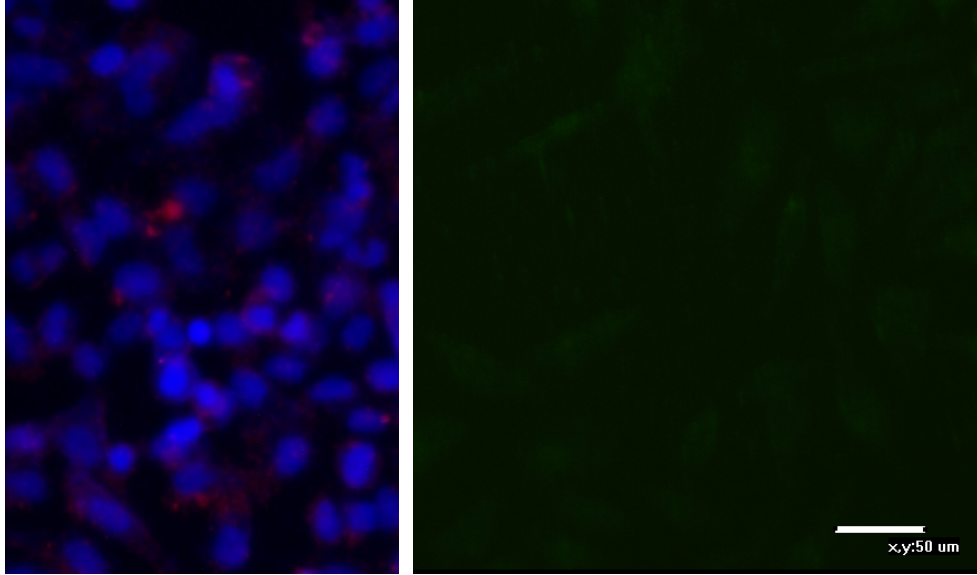

**Supplementary Figure 13.** siRNA release in the absence of NIR.

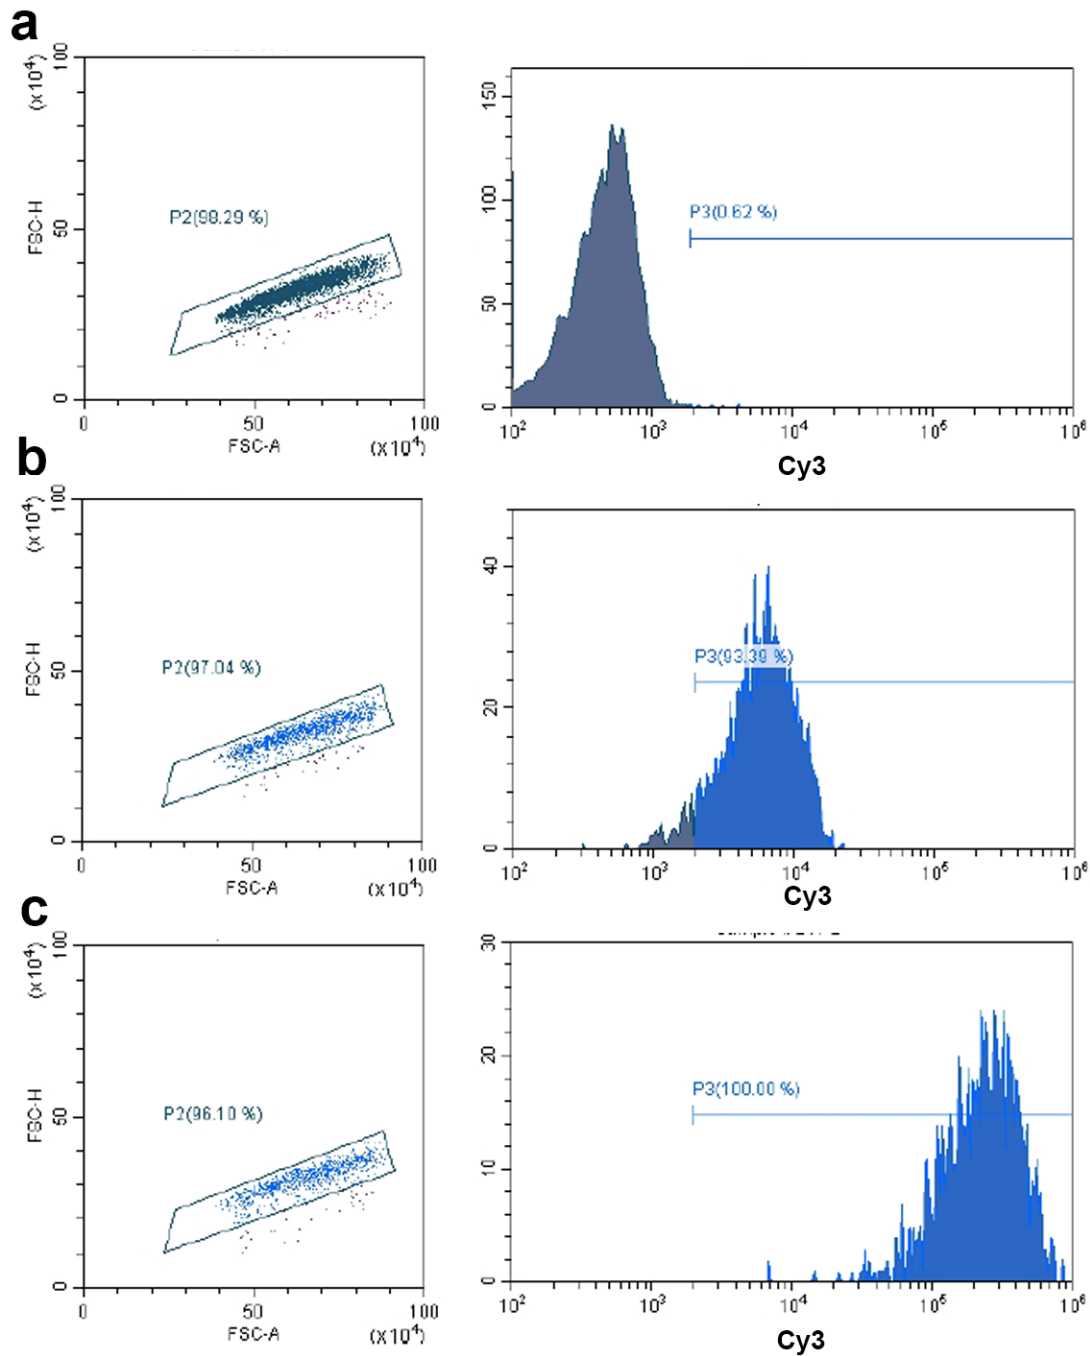

**Supplementary Figure 14.** Quantification of siRNA release in HeLa cells treated with OP-SBs@azo-Psi and excited with an 808 nm laser. (a: Control; b: OP-SBs@azo-Psi; c: OP-SBs@azo-Psi +NIR).

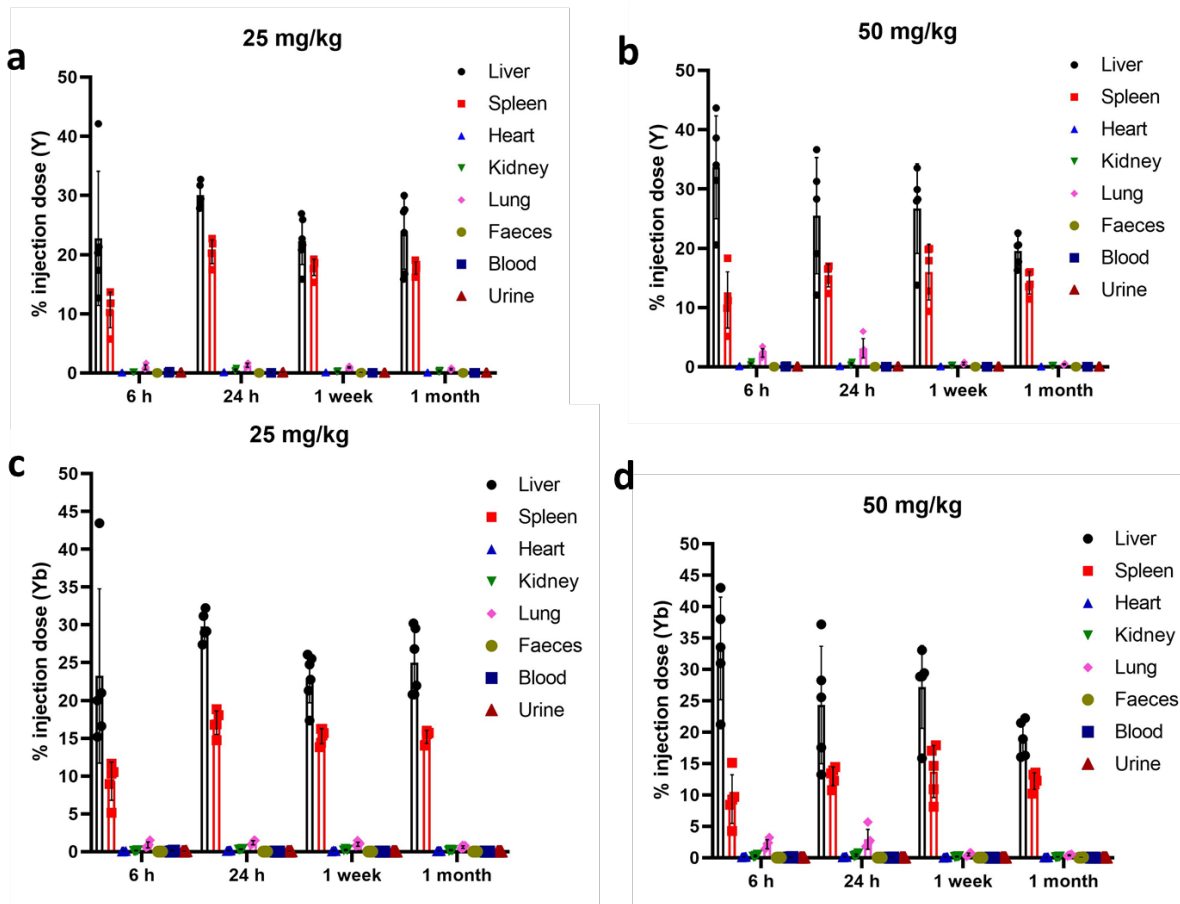

**Supplementary Figure 15.** Percentage of injected dose of Y (a, b) and Yb (c, d) in mice treated with 25 mg/kg OP-SBs (a, c) and 50 mg/kg OP-SBs (b, d). Error bars represent the standard deviation of five distinct measurements

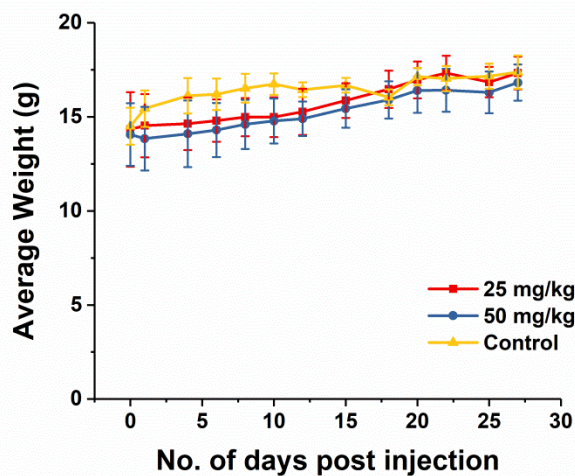

**Supplementary Figure 16.** Body weight of 3 groups were compared: untreated mice (control); mice injected with 25 mg/kg OP-SBs; mice injected with 50 mg/kg OP-SBs. Error bars represent the standard deviation of five distinct measurements.

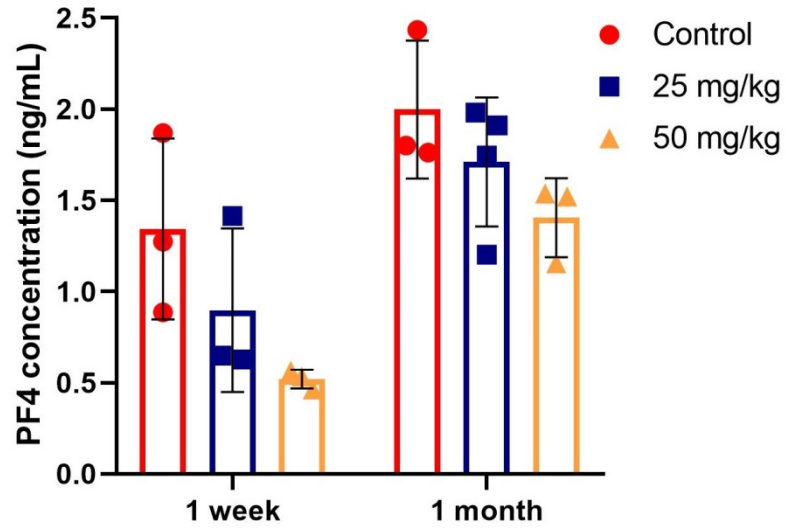

**Supplementary Figure 17.** PF4 concentration in blood serum determined at 1 week and 1 month post-injection. Error bars represent the standard deviation of three distinct measurements.

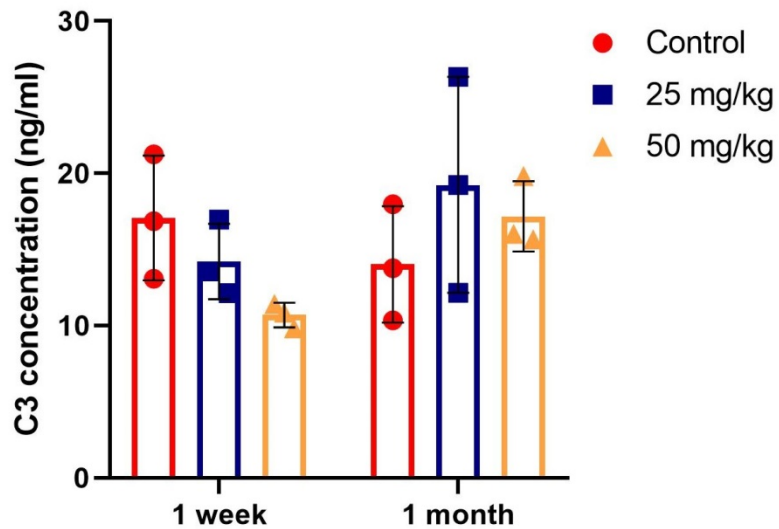

**Supplementary Figure 18.** C3 concentration in blood serum determined at 1 week and 1 month post-injection. Error bars represent the standard deviation of three measurements distinct.
